# Supplementary material for: A novel SnS2@graphene nanocable network for high-performance lithium storage
Source: Royal Society of Chemistry journal article supplement (doi:10.1039/c4ra03052d), 2014-01-01
Supplement: c4ra03052d1.pdf [file c4ra03052d1.pdf]

Supporting information

## A Novel $\text{SnS}_2$ @Graphene Nanocable Network for High-Performance Lithium Storage

Debin Kong,<sup>a,b,c</sup> Haiyong He,<sup>b</sup> Qi Song,<sup>b</sup> Bin Wang,<sup>b</sup> Quan-Hong Yang<sup>a,c,\*</sup> and Linjie Zhi<sup>a,b,c,\*</sup>

[\*]

<sup>a</sup>School of Chemical Engineering and Technology, Tianjin University, Tianjin, 300072 (China)

<sup>b</sup>National Center for Nanoscience and Technology, No. 11 Beiyitiao, Zhongguancun, Beijing, 100190 (China)

<sup>c</sup>The Synergistic Innovation Center of Chemistry and Chemical Engineering of Tianjin, Tianjin, 300072 (China)

E-mail: [zhilj@nanoctr.cn](mailto:zhilj@nanoctr.cn), [qhyangcn@tju.edu.cn](mailto:qhyangcn@tju.edu.cn)

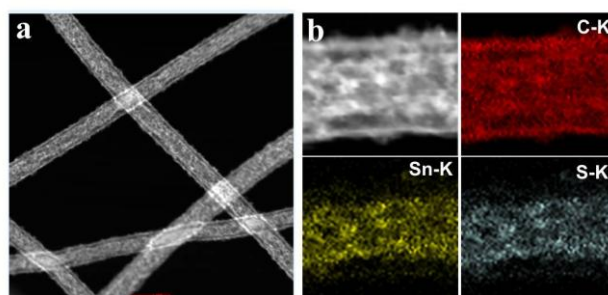

**Figure S1.** (a) Dark field transmission electron microscopy image. (b) Carbon, Tin and sulfur elemental mapping of a selected area of an individual  $\text{SnS}_2$ @GT. Scale bar, 100 nm.

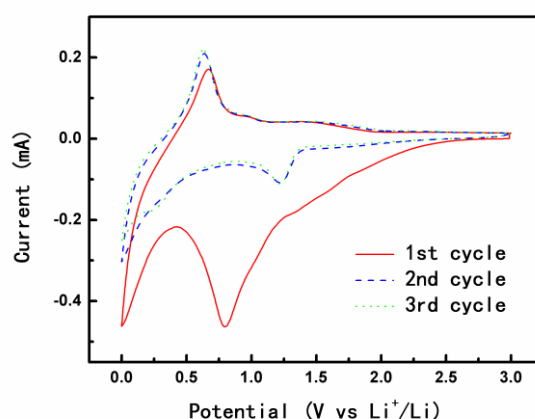

**Figure S2.** Cyclic voltammetry (CV) behavior of  $\text{SnS}_2$ @GT.

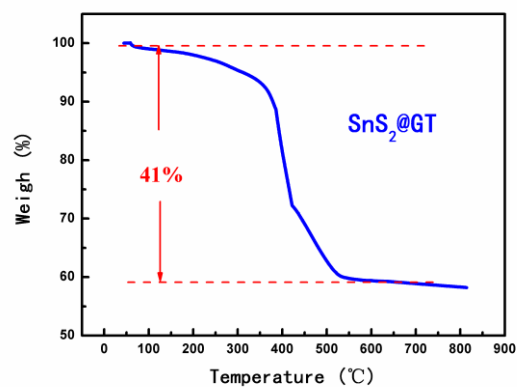

**Figure S3.** TGA of as-prepared SnS<sub>2</sub>@GT. The SnS<sub>2</sub> content estimated from the thermal analysis was ca. 71.6 wt % (Note: SnS<sub>2</sub> had been oxidized into SnO<sub>2</sub>). The analysis was taken in air using a heating rate of 10°C min<sup>-1</sup>. The weight loss from room temperature to 200°C was due to the removal of physisorbed and chemisorbed water.

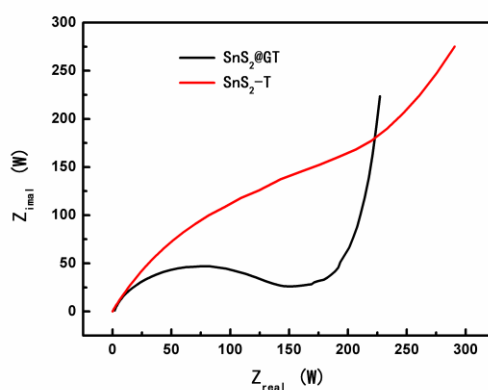

**Figure S4.** EIS of SnS<sub>2</sub>@GT and SnS<sub>2</sub>-T
